# Supplementary material for: The Motion Paradigm of Pre-Dock Zearalenone Hydrolase Predictions with Molecular Dynamics and the Docking Phase with Umbrella Sampling
Source: MDPI journal article supplement (doi:10.3390/molecules28114545), 2023-06-04
Supplement: s1 [file s1]

## **Supplemental Materials**

### **Title:**

The Motion Paradigm of Pre-dock Zearalenone Hydrolase Predicts with Molecular Dynamic and the Docking One with Umbrella Sampling

### **Author:**

**Xi-Zhi Hong<sup>1</sup>, Zheng-Gang Han<sup>1</sup>, Jiang-Ke Yang<sup>1\*</sup>, Yi-Han Liu<sup>2\*</sup>**

<sup>1</sup>Pilot Base of Food Microbial Resources Utilization of Hubei Province, College of Life Science and Technology, Wuhan Polytechnic University, Wuhan, China

<sup>2</sup>Key Laboratory of Industrial Fermentation Microbiology, Ministry of Education, The College of Biotechnology, Tianjin University of Science and Technology, Tianjin, China

### **\* Correspondence:**

Jiang-Ke Yang

yang.jiangke@whpu.edu.cn

Yi-Han Liu

lyh@tust.edu.cn

## Figure legend

**Figure S1.** Violin plot describe the number of representative sequences at different identity. The number at 60%, 70%, 80%, 90%, and 95% identity were plotted.

**Figure S2.** EMM calculation of mutant D45A and R139A compares to the wild type. (A)-(B) EMM of the complex with mutants D45A and R139A. (C)-(D) EMM of the interaction of the NbZHD and the zearalenone with mutants D45A and R139A.

**Figure S3.** RMSD of the concatenated window simulation. The concatenated simulation consists of 3000 frames and each frame is separated by 2 ps.

**Figure S4.** The structure colored smudge is the state 2 whose D170-R190 are colored slate. The structure colored wheat is the unbound state whose D170-R190 are colored violetpurple. The structure colored teal is the ZHD101 whose V153-H173 are colored olive. The structure colored gray is the ZHD607 whose V156-A176 are colored red. (A) Structure discrimination of the bolt between the state before ligand-docking of NbZHD and State 2. (B) Structure discrimination of the bolt between the state before ligand-docking of NbZHD and ZHD101. (C) Structure discrimination of the bolt between the state before ligand-docking of NbZHD and ZHD607. (D) Structure discrimination of the bolt between ZHD607 and ZHD101.

**Video S1.** The ligand rotates from the docking state to the releasing state.

**Video S2.** The ligand is released from the aperture of the hydrolase domain at the side view.

**Video S3.** The ligand is released from the aperture of the hydrolase domain at the front view.

**Table S1.** The table presents the frequency of occurrence of different residues within the 384 sequences involved in the motion pathway.

Figure S1

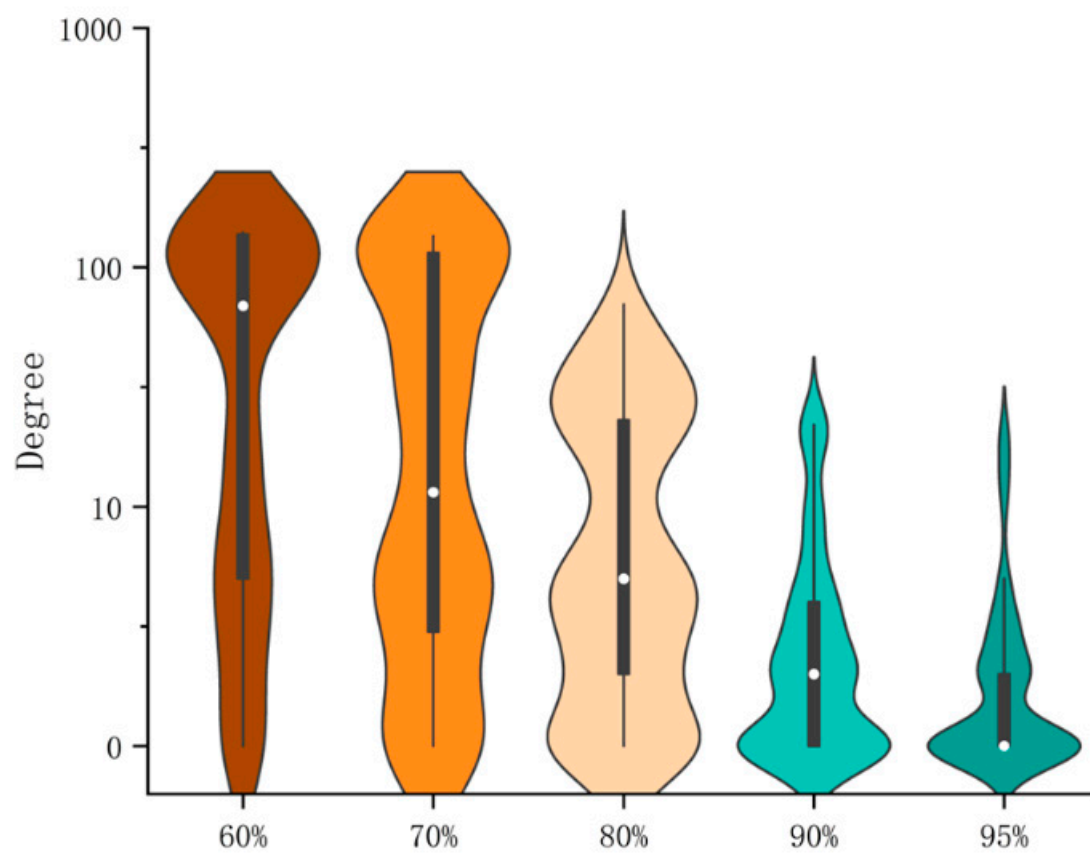

**Figure S2**

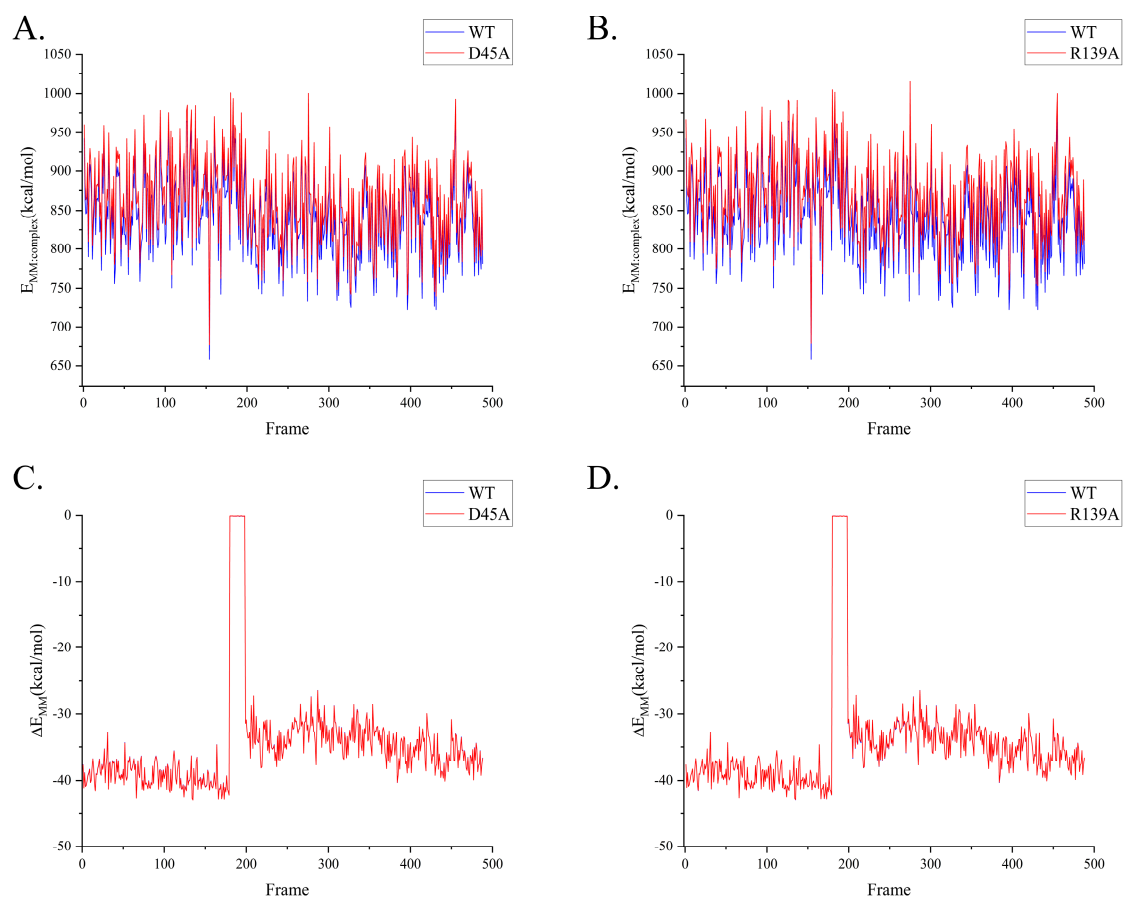

**Figure S3**

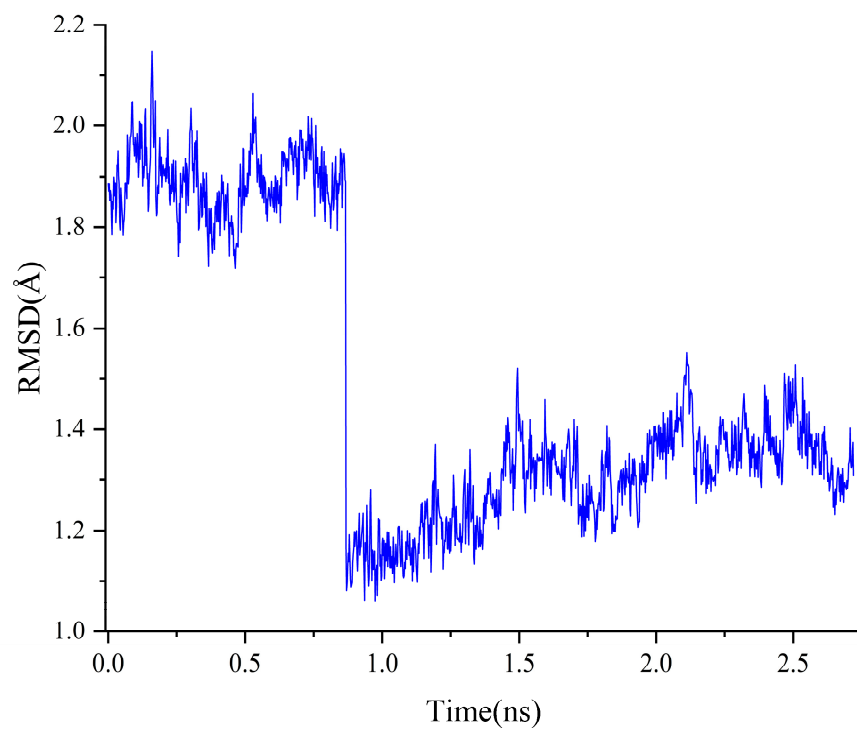

Figure S4

A.

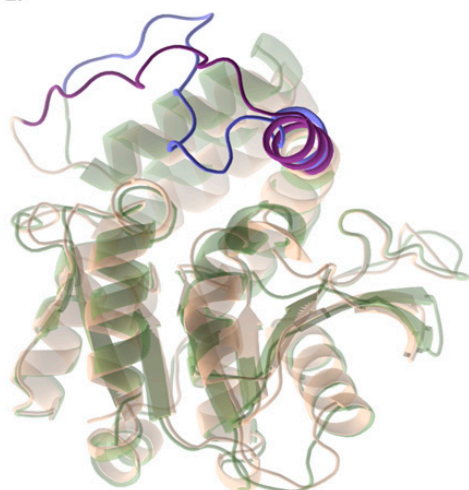

B.

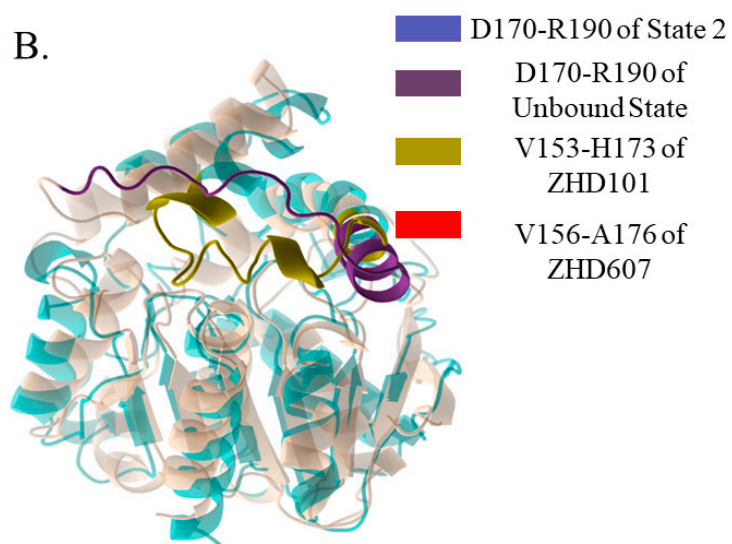

C.

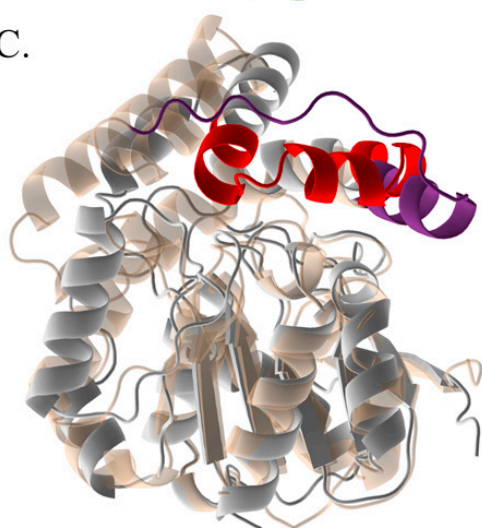

D.

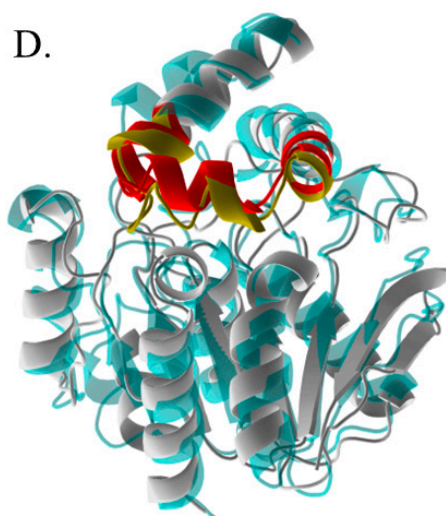

Table S1

|                         | 38    | 45    | 62    | 66    | 139   | 145   | 146   | 149   | 152   | 154   | 174   | 177     | 183   | 202   | 207   |
|-------------------------|-------|-------|-------|-------|-------|-------|-------|-------|-------|-------|-------|---------|-------|-------|-------|
| -                       | 0     | 0     | 0     | 3     | 4     | 2     | 20    | 11    | 24    | 1     | 26    | 17      | 19    | 1     | 35    |
| A                       | 27    | 144   | 6     | 31    | 14    | 9     | 6     | 27    | 22    | 45    | 124   | 43      | 41    | 4     | 69    |
| C                       | 0     | 0     | 0     | 5     | 0     | 1     | 5     | 1     | 0     | 1     | 0     | 2       | 18    | 4     | 2     |
| D                       | 125   | 17    | 0     | 45    | 0     | 0     | 40    | 30    | 16    | 4     | 6     | 59      | 7     | 13    | 4     |
| E                       | 45    | 11    | 0     | 3     | 7     | 2     | 68    | 88    | 78    | 16    | 9     | 85      | 23    | 60    | 3     |
| F                       | 0     | 7     | 0     | 2     | 13    | 7     | 1     | 104   | 4     | 3     | 0     | 6       | 8     | 6     | 1     |
| G                       | 19    | 60    | 10    | 2     | 3     | 1     | 10    | 3     | 16    | 2     | 54    | 57      | 5     | 7     | 4     |
| H                       | 0     | 50    | 1     | 6     | 3     | 1     | 10    | 16    | 7     | 5     | 0     | 2       | 4     | 1     | 0     |
| I                       | 0     | 0     | 0     | 9     | 17    | 30    | 2     | 5     | 4     | 38    | 0     | 1       | 0     | 120   | 8     |
| K                       | 10    | 3     | 0     | 26    | 4     | 9     | 8     | 0     | 13    | 7     | 7     | 5       | 4     | 4     | 1     |
| L                       | 0     | 1     | 1     | 185   | 138   | 119   | 4     | 30    | 2     | 136   | 7     | 5       | 6     | 3     | 7     |
| M                       | 0     | 1     | 0     | 4     | 6     | 16    | 1     | 3     | 3     | 14    | 7     | 0       | 1     | 5     | 118   |
| N                       | 3     | 1     | 0     | 11    | 3     | 1     | 0     | 3     | 1     | 15    | 3     | 1       | 2     | 0     | 0     |
| P                       | 45    | 0     | 1     | 10    | 2     | 1     | 20    | 1     | 1     | 14    | 101   | 66      | 14    | 7     | 24    |
| Q                       | 4     | 60    | 0     | 3     | 2     | 4     | 88    | 1     | 72    | 2     | 8     | 9       | 88    | 1     | 3     |
| R                       | 15    | 9     | 0     | 8     | 151   | 4     | 54    | 2     | 17    | 2     | 11    | 5       | 32    | 1     | 6     |
| S                       | 76    | 8     | 359   | 12    | 1     | 2     | 6     | 2     | 84    | 7     | 8     | 7       | 8     | 14    | 55    |
| T                       | 15    | 10    | 5     | 2     | 7     | 1     | 8     | 2     | 5     | 14    | 9     | 2       | 12    | 105   | 40    |
| V                       | 0     | 1     | 1     | 15    | 7     | 167   | 4     | 2     | 11    | 56    | 2     | 12      | 56    | 27    | 4     |
| W                       | 0     | 0     | 0     | 2     | 1     | 6     | 0     | 0     | 0     | 0     | 0     | 0       | 2     | 0     | 0     |
| Y                       | 0     | 1     | 0     | 0     | 1     | 1     | 29    | 53    | 4     | 2     | 2     | 0       | 34    | 1     | 0     |
| $V_S^*$                 | 1.733 | 1.900 | 4.272 | 2.178 | 2.311 | 2.336 | 1.338 | 1.610 | 1.426 | 1.733 | 1.845 | 1.438   | 1.195 | 1.867 | 1.655 |
| Conserved<br>Residues** | D     | A     | R     | L     | L/Q   | T     | E/P/Q | E/F   | E/Q/S | L     | A/P   | D/E/G/P | Q/V   | I/T   | M     |
| NbZHD***                | A     | D     | S     | L     | R     | V     | Q     | L     | Q     | L     | P     | E       | Q     | I     | M     |

\*:  $V_S$  is the coefficient of variation. When  $V_S$  is over 2, the corresponding sites are considered as highly conserved; while it below 2, the corresponding sites are considered as weakly conserved. And when  $V_S$  is over 1, the corresponding sites are considered conserved. \*\*: The conservative residues were selected based on their high frequency of occurrence and those with less than 40 occurrences. \*\*\*: The corresponding residue in NbZHD whose motion pathway is been detected.
